RESEARCH ARTICLE

# The association between weight-adjusted waist index and respiratory symptoms in U.S adults: A national cross-sectional study

Yu Wang<sup>1</sup>, Wenlu Chang<sup>1</sup>, Yiwei Lu<sup>1</sup>, Yi Xin<sup>1\*</sup>, Ximing Li<sup>1,2\*</sup>

**1** Department of Nutrition, Chest Hospital, Tianjin University, Tianjin, China, **2** Tianjin Key Laboratory of Cardiovascular Emergency and Critical Care, Tianjin Municipal Science and Technology Bureau, Tianjin, China

\* [yixinazg@163.com](mailto:yixinazg@163.com) (YX); [ljsunlight@126.com](mailto:ljsunlight@126.com) (XL)

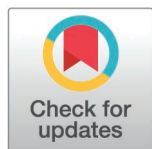

**OPEN ACCESS**

**Citation:** wang yu, Chang W, Lu Y, Xin Y, Li X (2025) The association between weight-adjusted waist index and respiratory symptoms in U.S adults: A national cross-sectional study. PLoS One 20(4): e0322013. <https://doi.org/10.1371/journal.pone.0322013>

**Editor:** Mohammad Amin Fraiwan, Jordan University of Science and Technology Faculty of Computer and Information Technology, JORDAN

**Received:** September 10, 2024

**Accepted:** March 16, 2025

**Published:** April 30, 2025

**Copyright:** © 2025 Wang et al. This is an open access article distributed under the terms of the [Creative Commons Attribution License](https://creativecommons.org/licenses/by/4.0/), which permits unrestricted use, distribution, and reproduction in any medium, provided the original author and source are credited.

**Data availability statement:** The survey data are publicly available on the internet for data users and researchers throughout the world ([www.cdc.gov/nchs/nhanes/](http://www.cdc.gov/nchs/nhanes/)). All data are fully available without restriction. All relevant data

## Abstract

### Objective

This study aimed to evaluate the relationship between the weight-adjusted waist index (WWI) and respiratory symptoms, including cough, wheezing, and dyspnea, as well as the related respiratory diseases, namely chronic obstructive pulmonary disease (COPD) and asthma, in adults.

### Methods

This cross-sectional study included 14,760 adults aged over 40 years, drawn from the National Health and Nutrition Examination Survey (NHANES) conducted between 2003 and 2012. Weighted logistic regression analysis was employed to investigate the association between WWI and respiratory symptoms, including cough, wheezing, and dyspnea, as well as related respiratory diseases such as COPD and asthma. Subgroup analyses and interaction tests were performed to stratify the data by age, gender, and race. Additionally, smooth curve fitting and threshold effect analyses were utilized to explore potential non-linear relationships between WWI and respiratory symptoms, as well as the associated respiratory diseases.

### Results

After adjusting for covariates, a positive association was observed between WWI and respiratory symptoms, including cough, wheezing, and dyspnea [odds ratio (OR): 1.39, 95% confidence interval (CI): 1.29–1.50; OR: 1.62, 95% CI: 1.51–1.73; OR: 1.58, 95% CI: 1.50–1.67]. This association extended to related respiratory diseases such as COPD and asthma (OR: 1.42, 95% CI: 1.30–1.54; OR: 1.43, 95% CI: 1.33–1.54). Subgroup analyses indicated that the relationship between WWI and wheezing was modified by race, whereas dyspnea was influenced by age, gender,

are within the paper and [supporting information](#) files.

**Funding:** This project was supported by the Scientific Research Program of Tianjin Municipal Education Commission [2022YGZD01], awarded to XL. The funders had no role in study design, data collection and analysis, decision to publish, or preparation of the manuscript.

**Competing interests:** The authors have declared that no competing interests exist.

and race. For COPD, the association was affected by gender. Smoothed curve fitting revealed nonlinear, J-shaped associations between WWI and cough, COPD, and asthma (OR: 1.39, 95% CI: 1.29–1.50,  $P < 0.001$ ; OR: 1.42, 95% CI: 1.30–1.54,  $P < 0.001$ ; OR: 1.43, 95% CI: 1.33–1.54,  $P < 0.001$ ). Furthermore, the breakpoint (K) was found to be 9.99 for both wheezing and dyspnea, with  $P < 0.05$  for log-likelihood ratios in both instances.

## Conclusions

This study provides evidence linking elevated levels of WWI to an increased risk of respiratory symptoms, including cough, wheezing, and dyspnea, as well as associated respiratory diseases such as COPD and asthma in U.S adults. These findings offer novel insights into the management of respiratory symptoms and diseases.

## Introduction

Patients can easily recognize common respiratory symptoms, including cough, wheezing, and dyspnea, which are hallmark indicators of conditions such as chronic obstructive pulmonary disease (COPD) and asthma [1,2]. These symptoms not only signify the presence of underlying chronic conditions but also represent a substantial threat to both physical and mental health [3,4]. Worldwide, respiratory diseases such as pneumonia, lung cancer, COPD, and asthma rank among the leading causes of disability and mortality [5–7]. More than half of the global adult population reports experiencing at least one respiratory symptom associated with these diseases [8–10], significantly affecting quality of life [11].

According to the World Health Organization, over one-third of American adults are classified as obese [12]. Research indicates that obesity is a significant risk factor and predictor of adverse health outcomes [13]. It is associated with a shortened life expectancy and a markedly increased risk of diseases, including dyslipidemia, hypertension, and hyperglycemia [14,15], particularly cardiovascular and pulmonary disorders [16,17]. The impact of obesity on respiratory health is influenced by various factors, including structural changes (such as a reduction in total lung capacity) and biochemical alterations (notably the deregulation of cytokines and adipokines) [18,19]. The mechanical effects of obesity restrict airway function, increase breathing resistance, and frequently result in dyspnea and wheezing. Moreover, obesity disrupts adipokine secretion and homeostasis, thereby facilitating the onset and progression of lung disease [19]. As a consequence, many obese patients experience respiratory symptoms and associated respiratory diseases.

In a recent study investigating the relationship between obesity and respiratory symptoms, researchers employed body mass index (BMI) to evaluate participants' obesity status. The study conducted by Sun et al. in the United States among individuals aged over 40 revealed a U-shaped association between BMI and respiratory symptoms, including cough, wheezing, dyspnea, asthma, and COPD [20]. However, it is essential to acknowledge the phenomenon known as the “obesity

paradox” [21]. This unexpected paradox may be attributed to BMI's inability to distinguish between muscle and fat mass. Currently, BMI is primarily used to assess central obesity and is regarded as a crude indicator of obesity predisposition [22]. The weight-adjusted waist index (WWI), proposed in 2018 [23], offers a more precise measure of fat and muscle mass composition. It primarily indicates central obesity and operates independently of body weight [24]. In a multi-ethnic study on atherosclerosis, WWI demonstrated positive correlations with abdominal fat measures and negative correlations with abdominal muscle mass measures, regardless of race or ethnicity [25]. This metric has shown a distinct advantage over BMI in the development of diseases across various systems [26]. These findings further emphasize the reliability and potential of WWI [25]. Nevertheless, no studies have investigated the association between WWI and respiratory symptoms, as well as the related respiratory diseases.

Consequently, our study aimed to investigate the association between WWI and respiratory symptoms—including cough, wheezing, and dyspnea—as well as related diseases such as COPD and asthma, utilizing a nationally representative sample from the National Health and Nutrition Examination Survey (NHANES).

## Methods

### Study population

We conducted a cross-sectional study utilizing data from the NHANES spanning 2003–2012. NHANES, a national survey administered by the National Center for Health Statistics (NCHS), aims to evaluate the nutrition and health status of the U.S population. The procedures employed in NHANES were approved by the NCHS Research Ethics Review Board (ERB). The portions of this study involving human participants, human materials, or human data were conducted in accordance with the Declaration of Helsinki. The participants provided their written informed consent to participate in this study. Comprehensive methodologies and results from NHANES can be accessed at [www.cdc.gov/nchs/nhanes/](http://www.cdc.gov/nchs/nhanes/).

The study population consisted of 18,118 participants aged over 40 years, derived from NHANES 2003–2012. We excluded participants with missing data from the respiratory symptom questionnaire ( $n = 55$ ) and those lacking WW data ( $n = 1,923$ ). Furthermore, participants with missing covariate data ( $n = 1,380$ ) were also excluded. Consequently, the final sample comprised 14,760 participants (see [Fig 1](#)).

### Evaluation of weight-adjusted waist index

The WWI, a novel metric designed to predict central obesity, is determined by dividing the waist circumference (WC, in cm) by the square root of body weight (in kg). A higher WWI score indicates a greater degree of obesity. Trained health technicians collected body measurements, including weight and WC, at the mobile examination center (MEC). The WWI for each participant was calculated by dividing the WC in centimeters by the square root of the weight in kilograms, with the result rounded to two decimal places [27]. WWI was treated as a continuous variable, and individuals were subsequently stratified into quartiles for analysis. In our study, WWI served as the exposure variable.

### Evaluation of respiratory symptoms and the associated respiratory diseases

Cough was confirmed based on a positive response to the question: “Do you usually cough on most days for 3 consecutive months or longer each year?” Wheezing and dyspnea were confirmed through affirmative responses to the questions: “In the past 12 months, have you experienced wheezing or whistling in your chest?” and “Have you had shortness of breath when hurrying on level ground or when walking up a slight hill?” The diagnosis of COPD was based on a positive response to the question: “Has a doctor or other health professional diagnosed you with chronic bronchitis or emphysema?” Similarly, the diagnosis of asthma was determined by a positive response to the question: “Has a doctor or other health professional diagnosed you with asthma?” [20].

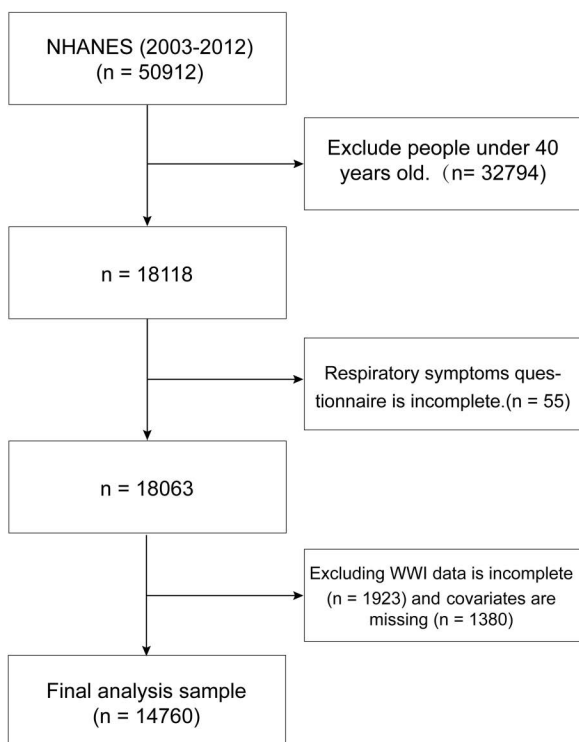

**Fig 1. Flow chart of the study population (NHANES 2003–2012).**

<https://doi.org/10.1371/journal.pone.0322013.g001>

### Selection of covariates

We incorporated demographic covariates, including age (in years), gender (male/female), race (Mexican-American, other Hispanic, non-Hispanic Black, non-Hispanic White), educational level (less than high school, high school, greater than high school), marital status (married/living with a partner, divorced/separated/widowed, never married), the ratio of income to poverty (PIR), and smoking status (having smoked more than 100 lifetime cigarettes) [20].

### Statistical analyses

According to the guidelines of the Centers for Disease Control and Prevention (CDC), all statistical analyses employed NHANES sampling weights, which accounted for the complex sampling design involving multiple stages of cluster surveys [28]. Continuous variables were summarized using either the mean  $\pm$  standard deviation or the median (interquartile range), depending on their distribution, while categorical variables were expressed as counts (percentages). We utilized chi-square and t-tests to assess differences between participants grouped by WWI quartiles. Weighted logistic regression analyses were conducted to investigate the association between WWI and respiratory symptoms, COPD, and asthma. Three models were developed to ensure the stability of the results after adjusting for various covariates. Model 1 included no covariate adjustments. Model 2 adjusted for age, gender, and race. Model 3 adjusted for age, gender, race, education level, marital status, PIR, and smoking status. Subgroup analyses were performed to explore the association between WWI and respiratory symptoms, COPD, and asthma across specific populations, considering variables such as age, gender, and race. Interaction tests were conducted to assess the consistency of correlations among subgroups, with interaction P-values calculated using interaction terms included in the logistic regression models. Smooth curve fitting and threshold effect analyses were employed to investigate the potential non-linear relationship between WWI and respiratory symptoms (cough,

wheezing, and dyspnea), as well as the associated respiratory diseases (COPD and asthma). Analyses were performed using R (version 4.2) or Empowerstats (version 2.0), with statistical significance defined as  $P < 0.05$  (two-sided).

## Results

### Baseline characteristics

The study involved 14,760 participants aged over 40 years, with a mean age of 59.70 years and a standard deviation of 12.66 years. Among these participants, 49.8% were male and 50.2% were female. The mean WWI for all participants was 11.24, with a standard deviation of 0.77. The prevalence rates for cough, wheezing, dyspnea, COPD, and asthma were 10.9%, 14.5%, 35.0%, 8.8%, and 12.2%, respectively. Significant differences were found across age, gender, race, education level, marital status, PIR, and smoking status among the WWI quartiles (all  $P < 0.05$ ) (see [Table 1](#)). Participants

**Table 1. Baseline characteristics of study population according to weight-adjusted waist index quartile.**

| Characteristics               | Total, n<br>14,760 | Weight-adjusted waist index      |                                   |                                   |                                   | P-value |
|-------------------------------|--------------------|----------------------------------|-----------------------------------|-----------------------------------|-----------------------------------|---------|
|                               |                    | Q 1<br>(7.90–10.71)<br>N = 3,690 | Q 2<br>(10.71–11.23)<br>N = 3,690 | Q 3<br>(11.23–11.75)<br>N = 3,690 | Q 4<br>(11.75–15.70)<br>N = 3,690 |         |
|                               |                    |                                  |                                   |                                   |                                   |         |
| Age (years)                   |                    | 53.56 ± 11.03                    | 57.65 ± 12.02                     | 61.79 ± 12.14                     | 65.80 ± 12.01                     | < 0.001 |
| Gender, (%)                   |                    |                                  |                                   |                                   |                                   | < 0.001 |
| Male                          | 7,344              | 54.7                             | 55.2                              | 51.5                              | 37.7                              |         |
| Female                        | 7,416              | 45.3                             | 44.8                              | 48.5                              | 62.4                              |         |
| Race, (%)                     |                    |                                  |                                   |                                   |                                   | < 0.001 |
| Mexican American              | 2,251              | 8.5                              | 15.0                              | 18.0                              | 19.5                              |         |
| Other Hispanic                | 1,942              | 12.1                             | 13.1                              | 14.2                              | 13.2                              |         |
| Non-Hispanic White            | 7,440              | 49.3                             | 50.4                              | 49.4                              | 52.6                              |         |
| Non-Hispanic Black            | 3,127              | 30.1                             | 21.5                              | 18.5                              | 14.7                              |         |
| Education level, (%)          |                    |                                  |                                   |                                   |                                   | < 0.001 |
| <high school                  | 4,372              | 19.9                             | 25.7                              | 31.7                              | 41.3                              |         |
| High school                   | 3,491              | 21.8                             | 23.4                              | 25.7                              | 23.8                              |         |
| > high school                 | 6,897              | 58.4                             | 51.0                              | 42.7                              | 35.0                              |         |
| Marital status, (%)           |                    |                                  |                                   |                                   |                                   | < 0.001 |
| Married/living with a partner | 9,213              | 64.8                             | 66.3                              | 65.3                              | 53.3                              |         |
| Divorced/separated/widowed    | 4,435              | 26.0                             | 26.7                              | 28.1                              | 39.3                              |         |
| Never married                 | 1,112              | 9.2                              | 7.0                               | 6.6                               | 7.4                               |         |
| PIR                           |                    | 3.04 ± 1.68                      | 2.79 ± 1.62                       | 2.57 ± 1.58                       | 2.19 ± 1.47                       | < 0.001 |
| Smoking, (%)                  |                    |                                  |                                   |                                   |                                   | < 0.05  |
| Yes                           | 7,248              | 49.1                             | 50.8                              | 52.2                              | 51.5                              |         |
| No                            | 7,512              | 51.0                             | 49.2                              | 47.8                              | 48.5                              |         |
| Comorbidities, (%)            |                    |                                  |                                   |                                   |                                   |         |
| COPD                          | 1,302              | 5.8                              | 7.2                               | 9.0                               | 13.3                              | <0.001  |
| Asthma                        | 1,796              | 10.4                             | 11.0                              | 11.9                              | 15.5                              | <0.001  |
| Respiratory symptoms, (%)     |                    |                                  |                                   |                                   |                                   |         |
| Cough                         | 1,601              | 8.4                              | 9.3                               | 10.7                              | 15.0                              | <0.001  |
| Wheezing                      | 2,145              | 11.2                             | 12.3                              | 15.3                              | 19.3                              | <0.001  |
| Dyspnea                       | 5,166              | 24.3                             | 31.0                              | 37.1                              | 47.6                              | <0.001  |

Mean ± SD for continuous variables: the P value was calculated by the weighted linear regression model. (%) for categorical variables: the P value was calculated by the weighted chi-square test. Abbreviation: PIR, ratio of income to poverty; COPD, chronic obstructive pulmonary disease; Q, quartile.

<https://doi.org/10.1371/journal.pone.0322013.t001>

in the lowest WWI quartile (Q1) demonstrated higher education levels, a greater PIR, and more favorable marital statuses compared to those in the highest WWI quartile (Q4). Furthermore, the prevalence of asthma, COPD, dyspnea, cough, and wheezing increased with ascending WWI quartiles (see [Table 1](#)).

### Associations between WWI and respiratory outcomes

Multifactorial logistic regression analysis revealed a positive association between WWI, treated as a continuous variable, and the incidence of cough, wheezing, and dyspnea in the unadjusted Model 1. These associations remained statistically significant in Model 3 after adjusting for potential confounders, which included age, gender, race, education level, marital status, PIR, and smoking [odds ratio (OR): 1.39, 95% confidence interval (CI): 1.29–1.50,  $P < 0.001$ ; OR: 1.62, 95% CI:

**Table 2. Association of weight-adjusted waist index and respiratory symptoms, COPD, and asthma.**

|                 | Model 1           | P-value | Model 2           | P-value | Model 3           | P-value |
|-----------------|-------------------|---------|-------------------|---------|-------------------|---------|
|                 | OR (95% CI)       |         | OR (95% CI)       |         | OR (95% CI)       |         |
| <b>Cough</b>    |                   |         |                   |         |                   |         |
| WWI             | 1.42 (1.33, 1.52) | < 0.001 | 1.52 (1.41, 1.64) | < 0.001 | 1.39 (1.29, 1.50) | < 0.001 |
| Q1              | reference         |         | reference         |         | reference         |         |
| Q2              | 1.11 (0.95, 1.31) | 0.1895  | 1.15 (0.98, 1.36) | 0.0850  | 1.11 (0.94, 1.31) | 0.2231  |
| Q3              | 1.31 (1.12, 1.53) | < 0.001 | 1.42 (1.21, 1.67) | < 0.001 | 1.29 (1.10, 1.53) | < 0.01  |
| Q4              | 1.93 (1.66, 2.23) | < 0.001 | 2.15 (1.83, 2.53) | < 0.001 | 1.80 (1.53, 2.12) | < 0.001 |
| <b>Wheezing</b> |                   |         |                   |         |                   |         |
| WWI             | 1.42 (1.34, 1.51) | < 0.001 | 1.72 (1.61, 1.84) | < 0.001 | 1.62 (1.51, 1.73) | < 0.001 |
| Q1              | reference         |         | reference         |         | reference         |         |
| Q2              | 1.10 (0.96, 1.27) | 0.1703  | 1.26 (1.09, 1.46) | < 0.01  | 1.23 (1.06, 1.42) | < 0.01  |
| Q3              | 1.42 (1.24, 1.63) | < 0.001 | 1.82 (1.58, 2.10) | < 0.001 | 1.72 (1.49, 1.99) | < 0.001 |
| Q4              | 1.88 (1.65, 2.14) | < 0.001 | 2.66 (2.31, 3.08) | < 0.001 | 2.35 (2.03, 2.72) | < 0.001 |
| <b>Dyspnea</b>  |                   |         |                   |         |                   |         |
| WWI             | 1.70 (1.63, 1.78) | < 0.001 | 1.68 (1.60, 1.77) | < 0.001 | 1.58 (1.50, 1.67) | < 0.001 |
| Q1              | reference         |         | reference         |         | reference         |         |
| Q2              | 1.40 (1.27, 1.56) | < 0.001 | 1.43 (1.29, 1.59) | < 0.001 | 1.40 (1.26, 1.55) | < 0.001 |
| Q3              | 1.84 (1.66, 2.03) | < 0.001 | 1.86 (1.67, 2.06) | < 0.001 | 1.76 (1.58, 1.95) | < 0.001 |
| Q4              | 2.84 (2.57, 3.13) | < 0.001 | 2.73 (2.45, 3.04) | < 0.001 | 2.42 (2.16, 2.70) | < 0.001 |
| <b>COPD</b>     |                   |         |                   |         |                   |         |
| WWI             | 1.58 (1.47, 1.70) | < 0.001 | 1.56 (1.44, 1.69) | < 0.001 | 1.42 (1.30, 1.54) | < 0.001 |
| Q1              | reference         |         | reference         |         | reference         |         |
| Q2              | 1.26 (1.04, 1.51) | < 0.05  | 1.28 (1.06, 1.54) | < 0.05  | 1.23 (1.02, 1.49) | < 0.05  |
| Q3              | 1.61 (1.35, 1.93) | < 0.001 | 1.63 (1.35, 1.96) | < 0.001 | 1.51 (1.25, 1.82) | < 0.001 |
| Q4              | 2.49 (2.10, 2.94) | < 0.001 | 2.40 (2.00, 2.87) | < 0.001 | 2.00 (1.66, 2.41) | < 0.001 |
| <b>Asthma</b>   |                   |         |                   |         |                   |         |
| WWI             | 1.29 (1.21, 1.38) | < 0.001 | 1.46 (1.36, 1.57) | < 0.001 | 1.43 (1.33, 1.54) | < 0.001 |
| Q1              | reference         |         | reference         |         | reference         |         |
| Q2              | 1.06 (0.92, 1.23) | 0.4279  | 1.19 (1.03, 1.38) | < 0.05  | 1.18 (1.02, 1.38) | < 0.05  |
| Q3              | 1.17 (1.01, 1.36) | < 0.05  | 1.42 (1.22, 1.66) | < 0.001 | 1.41 (1.21, 1.64) | < 0.001 |
| Q4              | 1.59 (1.38, 1.82) | < 0.001 | 1.99 (1.71, 2.32) | < 0.001 | 1.91 (1.63, 2.23) | < 0.001 |

Model 1: no covariates were adjusted. Model 2: age, gender, and race were adjusted. Model 3: age, gender, race, education level, marital status, PIR, and smoking were adjusted. Abbreviation: WWI, weight-adjusted waist index; Q, quartile; COPD, chronic obstructive pulmonary disease; OR, odds ratio; CI, confidence interval.

<https://doi.org/10.1371/journal.pone.0322013.t002>

1.51–1.73,  $P < 0.001$ ; OR: 1.58, 95% CI: 1.50–1.67,  $P < 0.001$ ] (Table 2). When WWI was categorized into quartiles, participants in the highest quartile (Q4) exhibited significantly higher odds of respiratory symptoms compared to those in the lowest quartile (Q1), including cough (OR: 1.80, 95% CI: 1.53–2.12,  $P < 0.001$ ), wheezing (OR: 2.35, 95% CI: 2.03–2.72,  $P < 0.001$ ), dyspnea (OR: 2.42, 95% CI: 2.16–2.70,  $P < 0.001$ ), COPD (OR: 2.00, 95% CI: 1.66–2.42,  $P < 0.001$ ), and asthma (OR: 1.91, 95% CI: 1.63–2.23,  $P < 0.001$ ) (Table 2).

### Subgroup analysis

Subgroup analyses and interaction tests were performed, stratified by age, gender, and race, to evaluate the consistency of the association between WWI and respiratory symptoms (Tables 3–5). Age significantly modified the association between WWI and dyspnea ( $P$  for interaction = 0.0383), with participants aged 60–69 years exhibiting a higher risk of cough and

**Table 3. Association between weight-adjusted waist index and respiratory symptoms, COPD, and asthma by age.**

|          | OR (95% CI)       | P-value | P for interaction |
|----------|-------------------|---------|-------------------|
| Cough    |                   |         | 0.2167            |
| Age      |                   |         |                   |
| 40–49    | 1.34 (1.15, 1.56) | < 0.001 |                   |
| 50–59    | 1.30 (1.12, 1.52) | < 0.001 |                   |
| 60–69    | 1.61 (1.37, 1.89) | < 0.001 |                   |
| ≥ 70     | 1.34 (1.16, 1.54) | < 0.001 |                   |
| Wheezing |                   |         | 0.2477            |
| Age      |                   |         |                   |
| 40–49    | 1.56 (1.38, 1.77) | < 0.001 |                   |
| 50–59    | 1.57 (1.38, 1.80) | < 0.001 |                   |
| 60–69    | 1.81 (1.57, 2.08) | < 0.001 |                   |
| ≥ 70     | 1.50 (1.31, 1.72) | < 0.001 |                   |
| Dyspnea  |                   |         | < 0.05            |
| Age      |                   |         |                   |
| 40–49    | 1.65 (1.49, 1.82) | < 0.001 |                   |
| 50–59    | 1.66 (1.49, 1.85) | < 0.001 |                   |
| 60–69    | 1.70 (1.53, 1.88) | < 0.001 |                   |
| ≥ 70     | 1.42 (1.29, 1.56) | < 0.001 |                   |
| COPD     |                   |         | 0.1351            |
| Age      |                   |         |                   |
| 40–49    | 1.43 (1.20, 1.71) | < 0.001 |                   |
| 50–59    | 1.41 (1.18, 1.69) | < 0.001 |                   |
| 60–69    | 1.60 (1.35, 1.89) | < 0.001 |                   |
| ≥ 70     | 1.23 (1.06, 1.42) | < 0.01  |                   |
| Asthma   |                   |         | 0.1863            |
| Age      |                   |         |                   |
| 40–49    | 1.46 (1.28, 1.67) | < 0.001 |                   |
| 50–59    | 1.26 (1.10, 1.45) | < 0.01  |                   |
| 60–69    | 1.56 (1.35, 1.80) | < 0.001 |                   |
| ≥ 70     | 1.37 (1.19, 1.59) | < 0.001 |                   |

Gender, race, education level, marital status, PIR, and smoking were adjusted. Abbreviation: COPD, chronic obstructive pulmonary disease; OR, odds ratio; CI, confidence interval.

<https://doi.org/10.1371/journal.pone.0322013.t003>

wheezing per unit increase in WWI (cough: OR = 1.61, 95% CI: 1.37–1.89,  $P < 0.001$ ; wheezing: OR = 1.81, 95% CI: 1.57–2.08,  $P < 0.001$ ) (Table 3). The association between WWI and dyspnea and COPD also demonstrated significant gender differences (Table 4), with males exhibiting a greater risk of cough and wheezing per unit increase in WWI (cough: OR = 1.43, 95% CI: 1.28–1.60,  $P < 0.001$ ; wheezing: OR = 1.69, 95% CI: 1.53–1.87,  $P < 0.001$ ). Race significantly influenced the association between WWI and wheezing and dyspnea (Table 5), with non-Hispanic Black participants demonstrating the highest risk of developing cough per unit increase in WWI (OR = 1.66, 95% CI: 1.40–1.98,  $P < 0.001$ ).

### Smooth curve fitting and threshold effect analysis

Non-linear associations were identified between WWI and respiratory symptoms, including cough, wheezing, and dyspnea, as well as respiratory diseases such as COPD and asthma, employing smooth curve fitting and threshold effect analysis (Fig 2). J-shaped relationships were established between WWI and cough, COPD, and asthma, with OR of 1.39 (95% CI: 1.29–1.50,  $P < 0.001$ ), 1.42 (95% CI: 1.30–1.54,  $P < 0.001$ ), and 1.43 (95% CI: 1.33–1.54,  $P < 0.001$ ), respectively (Table 6). A threshold effect was noted, indicating a breakpoint (K) of 9.99 for both wheezing and dyspnea (log-likelihood ratio  $< 0.05$ ) (Table 6). In comparison to the right side of the breakpoint, where the odds ratios were 1.58 (95% CI: 1.47–1.70,  $P < 0.001$ ) for wheezing and 1.55 (95% CI: 1.46–1.63,  $P < 0.001$ ) for dyspnea, WWI on the left side of the breakpoint showed a significantly greater increase in the incidence of these symptoms with each unit increase in WWI, with odds ratios of 3.65 (95% CI: 1.55–8.56,  $P < 0.01$ ) for wheezing and 3.07 (95% CI: 1.73–5.44,  $P < 0.001$ ) for dyspnea.

### Discussion

In this cross-sectional study involving 14,760 Americans aged 40 years or older, we found that higher levels of WWI were associated with an increased risk of respiratory symptoms and diseases. Smooth curve fitting revealed a nonlinear J-shaped association between WWI and the incidence of cough, COPD, and asthma. Furthermore, we identified a breakpoint (K) for wheezing and dyspnea at 9.99. For each unit increase in WWI, the incidence of wheezing and dyspnea was significantly higher at the left breakpoint (WWI = 9.99) compared to the right breakpoint.

**Table 4. Association between weight-adjusted waist index and respiratory symptoms, COPD, and asthma by gender.**

|          | OR (95% CI)       | P-value | P for interaction |
|----------|-------------------|---------|-------------------|
| Cough    |                   |         | 0.5023            |
| Male     | 1.43 (1.28, 1.60) | < 0.001 |                   |
| Female   | 1.36 (1.24, 1.50) | < 0.001 |                   |
| Wheezing |                   |         | 0.2558            |
| Male     | 1.69 (1.53, 1.87) | < 0.001 |                   |
| Female   | 1.57 (1.44, 1.71) | < 0.001 |                   |
| Dyspnea  |                   |         | < 0.001           |
| Male     | 1.83 (1.69, 1.99) | < 0.001 |                   |
| Female   | 1.44 (1.35, 1.54) | < 0.001 |                   |
| COPD     |                   |         | < 0.001           |
| Male     | 1.73 (1.50, 1.98) | < 0.001 |                   |
| Female   | 1.26 (1.14, 1.40) | < 0.001 |                   |
| Asthma   |                   |         | 0.9774            |
| Male     | 1.43 (1.27, 1.60) | < 0.001 |                   |
| Female   | 1.43 (1.31, 1.56) | < 0.001 |                   |

Age, race, education level, marital status, PIR, and smoking were adjusted. Abbreviation: COPD, chronic obstructive pulmonary disease; OR, odds ratio; CI, confidence interval.

<https://doi.org/10.1371/journal.pone.0322013.t004>

**Table 5. Association between weight-adjusted waist index and respiratory symptoms, COPD, and asthma by race.**

|                    | OR (95% CI)       | P-value | P for interaction |
|--------------------|-------------------|---------|-------------------|
| Cough              |                   |         | 0.0748            |
| Mexican American   | 1.19 (0.92, 1.52) | 0.1829  |                   |
| Other race         | 1.48 (1.15, 1.92) | < 0.01  |                   |
| Non-Hispanic White | 1.33 (1.20, 1.46) | < 0.001 |                   |
| Non-Hispanic Black | 1.66 (1.40, 1.98) | < 0.001 |                   |
| Wheezing           |                   |         | < 0.05            |
| Mexican American   | 1.40 (1.13, 1.73) | < 0.01  |                   |
| Other race         | 2.13 (1.70, 2.66) | < 0.001 |                   |
| Non-Hispanic White | 1.59 (1.45, 1.75) | < 0.001 |                   |
| Non-Hispanic Black | 1.60 (1.40, 1.82) | < 0.001 |                   |
| Dyspnea            |                   |         | < 0.05            |
| Mexican American   | 1.52 (1.33, 1.74) | < 0.001 |                   |
| Other race         | 1.95 (1.68, 2.26) | < 0.001 |                   |
| Non-Hispanic White | 1.59 (1.48, 1.70) | < 0.001 |                   |
| Non-Hispanic Black | 1.46 (1.32, 1.61) | < 0.001 |                   |
| COPD               |                   |         | 0.2795            |
| Mexican American   | 1.21 (0.89, 1.66) | 0.2291  |                   |
| Other race         | 1.81 (1.35, 2.42) | < 0.001 |                   |
| Non-Hispanic White | 1.38 (1.24, 1.54) | < 0.001 |                   |
| Non-Hispanic Black | 1.39 (1.16, 1.66) | < 0.001 |                   |
| Asthma             |                   |         | 0.2695            |
| Mexican American   | 1.15 (0.90, 1.47) | 0.2689  |                   |
| Other race         | 1.57 (1.26, 1.95) | < 0.001 |                   |
| Non-Hispanic White | 1.45 (1.31, 1.60) | < 0.001 |                   |
| Non-Hispanic Black | 1.47 (1.28, 1.70) | < 0.001 |                   |

Age, gender, education level, marital status, PIR, and smoking were adjusted. Abbreviation: COPD, chronic obstructive pulmonary disease; OR, odds ratio; CI, confidence interval.

<https://doi.org/10.1371/journal.pone.0322013.t005>

In this cross-sectional study involving 44,480 U.S adults, utilizing NHANES data from 2001 to 2018, Yu et al. identified a positive correlation between WWI and the prevalence of asthma. Smooth curve fitting revealed a nonlinear relationship characterized by a threshold saturation effect, with an inflection point at 10.53 [29]. These findings generally align with our results; however, differences in inflection points may arise from variations in the populations studied. Sun et al. reported a U-shaped relationship between BMI, serving as an indicator of obesity, respiratory symptoms, and related diseases [20]. In contrast, our findings indicate a J-shaped relationship between WWI and respiratory symptoms, as well as related diseases, diverging from Sun et al.'s observations. These discrepancies may be partly attributed to the 'obesity paradox' [30], a phenomenon that warrants consideration, as well as BMI's limitations in distinguishing between fat mass and lean mass and its failure to account for localized fat distribution patterns [31]. Subgroup analyses by age, gender, and race were performed to evaluate the stability of the association between WWI and respiratory symptoms, along with associated respiratory diseases. The association between WWI and dyspnea and COPD exhibited significant variation by gender (P for interaction < 0.001), with males demonstrating a greater susceptibility to this correlation compared to females. Based on our findings, we hypothesize that variations in sex hormones contribute to disparities in fat metabolism and distribution patterns. Previous research has established a link between reduced testosterone levels and abdominal obesity in males,

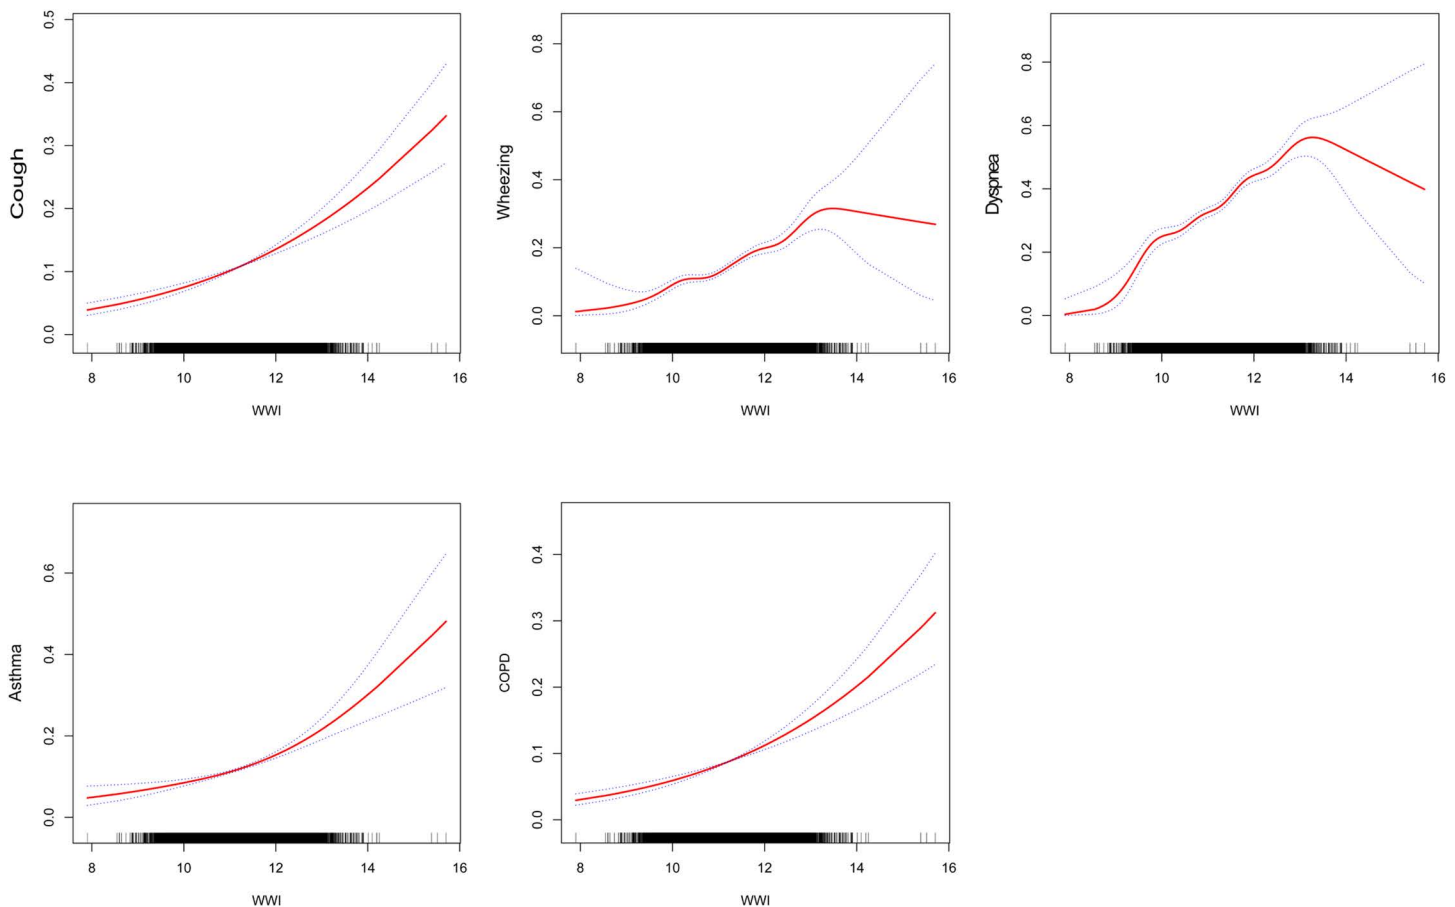

**Fig 2. Relationship between WWI and incidence of respiratory symptoms, asthma, and COPD after adjusting for age, gender, race, education level, marital status, PIR, and smoking.** Panel (A) shows the association between WWI and the incidence of cough, panel (B) shows the association between WWI and the incidence of wheezing, panel (C) shows the association between WWI and the incidence of dyspnea, panel (D) shows the association between WWI and the incidence of asthma, and panel (E) shows the association between BMI and the incidence of COPD.

<https://doi.org/10.1371/journal.pone.0322013.g002>

in contrast to the androgen excess observed in obese females [32]. Estrogen plays a role in the distribution of fat primarily in women’s thighs, hips, breasts, and other peripheral areas [33].

This study represents the first investigation into the relationship between WWI and respiratory symptoms, highlighting a positive association between WWI and the risk of developing COPD and asthma. WWI was utilized in this cross-sectional study to assess the level of ‘true obesity.’ The conclusions of our study are broadly applicable to the entire U.S population due to the use of nationally representative data with appropriate sample weights. Our analytical approach involved multifactorial logistic regression models that adjusted for several relevant covariates. Additionally, the substantial sample size enabled us to robustly validate our findings through subgroup analyses. However, it is crucial to acknowledge several limitations of our study. Firstly, the cross-sectional design precludes the establishment of causality between WWI and respiratory symptoms. Secondly, although we adjusted for multiple covariates, the NHANES database lacks comprehensive data on certain potential confounders, such as environmental exposures (e.g., air pollution or occupational hazards) and healthcare access (e.g., frequency of visits, regional disparities). These unmeasured factors may influence the observed associations. Thirdly, the dataset spans the years 2003–2012; while the underlying biological mechanisms and risk factors are unlikely to have changed significantly, potential shifts in environmental exposures and healthcare trends may affect

**Table 6. Threshold effect analyses between WWI and respiratory symptoms, COPD, and asthma.**

|                         | OR (95% CI)       | P-value |
|-------------------------|-------------------|---------|
| <b>Cough</b>            |                   |         |
| Standard logistic model | 1.39 (1.29, 1.50) | < 0.001 |
| Infection point (K)     | 9.99              |         |
| WWI < K                 | 2.25 (0.88, 5.71) | 0.0897  |
| WWI > K                 | 1.37 (1.26, 1.49) | < 0.001 |
| Log-likelihood ratio    |                   | 0.294   |
| <b>Wheezing</b>         |                   |         |
| Standard logistic model | 1.62 (1.51, 1.73) | < 0.001 |
| Infection point (K)     | 9.99              |         |
| WWI < K                 | 3.65 (1.55, 8.56) | < 0.01  |
| WWI > K                 | 1.58 (1.47, 1.70) | < 0.001 |
| Log-likelihood ratio    |                   | < 0.05  |
| <b>Dyspnea</b>          |                   |         |
| Standard logistic model | 1.58 (1.50, 1.67) | < 0.001 |
| Infection point (K)     | 9.99              |         |
| WWI < K                 | 3.07 (1.73, 5.44) | < 0.001 |
| WWI > K                 | 1.55 (1.46, 1.63) | < 0.001 |
| Log-likelihood ratio    |                   | < 0.05  |
| <b>COPD</b>             |                   |         |
| Standard logistic model | 1.42 (1.30, 1.54) | < 0.001 |
| Infection point (K)     | 12.3              |         |
| WWI < K                 | 1.47 (1.33, 1.63) | < 0.001 |
| WWI > K                 | 1.10 (0.78, 1.57) | 0.5875  |
| Log-likelihood ratio    | 0.139             | 0.139   |
| <b>Asthma</b>           |                   |         |
| Standard logistic model | 1.43 (1.33, 1.54) | < 0.001 |
| Infection point (K)     | 12.18             |         |
| WWI < K                 | 1.36 (1.25, 1.49) | < 0.001 |
| WWI>K                   | 1.82 (1.41, 2.36) | < 0.001 |
| Log-likelihood ratio    |                   | 0.056   |

Age, gender, race, education level, marital status, PIR, and smoking were adjusted. Abbreviation: WWI, weight-adjusted waist index; COPD, chronic obstructive pulmonary disease; OR, odds ratio; CI, confidence interval.

<https://doi.org/10.1371/journal.pone.0322013.t006>

the applicability of our findings to contemporary populations. Finally, regarding the generalizability of NHANES data, it is important to recognize both its strengths and limitations. Certain subpopulations, such as recent immigrants, individuals in rural or remote areas, and populations outside the U.S, may be underrepresented or inadequately captured. Additionally, cultural, environmental, and healthcare differences in non-U.S populations may limit the international applicability of these findings. While NHANES provides robust data for population-level analyses, future research in diverse populations and settings is needed to ensure broader generalizability.

## Conclusions

This study demonstrated a significant positive association between higher WWI and an increased risk of respiratory symptoms (cough, wheezing, and dyspnea) as well as respiratory diseases (COPD and asthma). Subgroup analyses revealed

that these associations were influenced by age, gender, and race, while smoothed curve fitting suggested a J-shaped relationship for certain outcomes. Further research is needed to confirm these findings and explore the underlying mechanisms.

## Supporting information

### S1 File. The original data set for this study.

(XLS)

## Acknowledgments

We would like to thank all participants in this study.

## Author contributions

**Conceptualization:** yu wang.

**Data curation:** Wenlu Chang, Yiwei Lu, Yi Xin.

**Funding acquisition:** Ximing Li.

**Investigation:** yu wang, Wenlu Chang.

**Methodology:** yu wang, Yi Xin.

**Project administration:** Ximing Li.

**Resources:** Yiwei Lu, Yi Xin, Ximing Li.

**Software:** yu wang.

**Supervision:** Ximing Li.

**Validation:** Wenlu Chang.

## References

- Walsh J, Thomashow B. Guiding principles for COPD treatment. *Provider*. 2014;40(7):41–2. PMID: [25158394](#)
- Kwah JH, Peters AT. Asthma in adults: Principles of treatment. *Allergy Asthma Proc*. 2019;40(6):396–402. <https://doi.org/10.2500/aap.2019.40.4256> PMID: [31690379](#)
- Myers TR, Tomasio L. Asthma: 2015 and beyond. *Respir Care*. 2011;56(9):1389–407; discussion 407-10. <https://doi.org/10.4187/respcare.01334> PMID: [21944687](#)
- Sheikh K, Coxson HO, Parraga G. This is what COPD looks like. *Respirology*. 2016;21(2):224–36. <https://doi.org/10.1111/resp.12611> PMID: [26333307](#)
- GBD Chronic Respiratory Disease Collaborators. Prevalence and attributable health burden of chronic respiratory diseases, 1990-2017: a systematic analysis for the Global Burden of Disease Study 2017. *Lancet Respir Med*. 2020;8(6):585–96. [https://doi.org/10.1016/S2213-2600\(20\)30105-3](https://doi.org/10.1016/S2213-2600(20)30105-3) PMID: [32526187](#)
- Snell N, Strachan D, Hubbard R, Gibson J, Limb E, Gupta R, et al. Burden of lung disease in the UK; findings from the British Lung Foundation's 'respiratory health of the nation' project. *European Respiratory Journal*. 48(suppl 60):PA4913. 2016
- Global burden of 369 diseases and injuries in 204 countries and territories, 1990-2019: a systematic analysis for the Global Burden of Disease Study 2019. *Lancet* 2020;396:102581204-22
- Voll-Aanerud M, Eagan TM, Wentzel-Larsen T, Gulsvik A, Bakke PS. Respiratory symptoms, COPD severity, and health related quality of life in a general population sample. *Respir Med* 102(3):399-406. 2008.
- Stavem K, Johannessen A, Nielsen R, Gulsvik A. Respiratory symptoms and respiratory deaths: A multi-cohort study with 45 years observation time. *PLoS One*. 2021;16(11):e0260416.
- Gulsvik A, Bakke PS, Brøgger J, Nielsen R, Stavem K. Respiratory symptoms and mortality in four general population cohorts over 45 years. *Respir Med*. 2020;170:106060. <https://doi.org/10.1016/j.rmed.2020.106060> PMID: [32843179](#)
- Voll-Aanerud M, Eagan TM, Plana E, Omenaas ER, Bakke PS, Svanes C, et al. Respiratory symptoms in adults are related to impaired quality of life, regardless of asthma and COPD: results from the European community respiratory health survey. *Health Qual Life Outcomes*. 2010;8:107. <https://doi.org/10.1186/1477-7525-8-107> PMID: [20875099](#)

12. Bastard JP, Jardel C, Bruckert E, Blondy P, Capeau J, Laville M, et al. Elevated levels of interleukin 6 are reduced in serum and subcutaneous adipose tissue of obese women after weight loss. *J Clin Endocrinol Metab.* 2000;85(9):3338–42. <https://doi.org/10.1210/jcem.85.9.6839> PMID: [10999830](https://pubmed.ncbi.nlm.nih.gov/10999830/)
13. Lavie CJ, Alpert MA, Arena R, Mehra MR, Milani RV, Ventura HO. Impact of obesity and the obesity paradox on prevalence and prognosis in heart failure. *JACC Heart Fail.* 2013;1(2):93–102. <https://doi.org/10.1016/j.jchf.2013.01.006> PMID: [24621833](https://pubmed.ncbi.nlm.nih.gov/24621833/)
14. Matsuda M, Shimomura I. Increased oxidative stress in obesity: implications for metabolic syndrome, diabetes, hypertension, dyslipidemia, atherosclerosis, and cancer. *Obes Res Clin Pract.* 2013;7(5):e330–41. <https://doi.org/10.1016/j.orcp.2013.05.004> PMID: [24455761](https://pubmed.ncbi.nlm.nih.gov/24455761/)
15. Ng M, Fleming T, Robinson M, Thomson B, Graetz N, Margono C, et al. Global, regional, and national prevalence of overweight and obesity in children and adults during 1980–2013: a systematic analysis for the Global Burden of Disease Study 2013. *Lancet* 384(9945):766–81. 2014.
16. Marfella R, Grella R, Rizzo MR, Barbieri M, Grella R, Ferraraccio F, et al. Role of subcutaneous abdominal fat on cardiac function and proinflammatory cytokines in premenopausal obese women. *Ann Plast Surg.* 2009;63(5):490–5. <https://doi.org/10.1097/SAP.0b013e3181955cdb> PMID: [19806043](https://pubmed.ncbi.nlm.nih.gov/19806043/)
17. Corbi G, Bianco A, Turchiarelli V, Cellurale M, Fatica F, Daniele A, et al. Potential mechanisms linking atherosclerosis and increased cardiovascular risk in COPD: focus on Sirtuins. *Int J Mol Sci.* 2013;14(6):12696–713. <https://doi.org/10.3390/ijms140612696> PMID: [23774840](https://pubmed.ncbi.nlm.nih.gov/23774840/)
18. Bosello O, Donataccio MP, Cuzzolaro M. Obesity or obesities? Controversies on the association between body mass index and premature mortality. *Eat Weight Disord.* 2016;21(2):165–74. <https://doi.org/10.1007/s40519-016-0278-4> PMID: [27043948](https://pubmed.ncbi.nlm.nih.gov/27043948/)
19. Bianco A, Mazzarella G, Turchiarelli V, Nigro E, Corbi G, Scudiero O, et al. Adiponectin: an attractive marker for metabolic disorders in Chronic Obstructive Pulmonary Disease (COPD). *Nutrients.* 2013;5(10):4115–25. <https://doi.org/10.3390/nu5104115> PMID: [24128974](https://pubmed.ncbi.nlm.nih.gov/24128974/)
20. Sun Y, Zhang Y, Liu X, Liu Y, Wu F, Liu X. Association between body mass index and respiratory symptoms in US adults: a national cross-sectional study. *Sci Rep.* 2024;14(1):940. <https://doi.org/10.1038/s41598-024-51637-z> PMID: [38195711](https://pubmed.ncbi.nlm.nih.gov/38195711/)
21. Giri Ravindran S, Saha D, Iqbal I, Jhaveri S, Avanthika C, Naagendran MS, et al. The Obesity Paradox in Chronic Heart Disease and Chronic Obstructive Pulmonary Disease. *Cureus.* 2022;14(6):e25674.
22. Thomas EL, Frost G, Taylor-Robinson SD, Bell JD. Excess body fat in obese and normal-weight subjects. *Nutr Res Rev.* 2012;25(1):150–61. <https://doi.org/10.1017/S0954422412000054> PMID: [22625426](https://pubmed.ncbi.nlm.nih.gov/22625426/)
23. Park Y, Kim NH, Kwon TY, Kim SG. A novel adiposity index as an integrated predictor of cardiometabolic disease morbidity and mortality. *Sci Rep.* 2018;8(1):16753.
24. Li Q, Qie R, Qin P, Zhang D, Guo C, Zhou Q, et al. Association of weight-adjusted-waist index with incident hypertension: The Rural Chinese Cohort Study. *Nutr Metab Cardiovasc Dis.* 2020;30(10):1732–41. <https://doi.org/10.1016/j.numecd.2020.05.033> PMID: [32624344](https://pubmed.ncbi.nlm.nih.gov/32624344/)
25. Kim JY, Choi J, Vella CA, Criqui MH, Allison MA, Kim NH. Associations between Weight-Adjusted Waist Index and Abdominal Fat and Muscle Mass: Multi-Ethnic Study of Atherosclerosis. *Diabetes Metab J.* 2022;46(5):747–55. <https://doi.org/10.4093/dmj.2021.0294> PMID: [35350091](https://pubmed.ncbi.nlm.nih.gov/35350091/)
26. Donini LM, Pinto A, Giusti AM, Lenzi A, Poggiogalle E. Obesity or BMI Paradox? Beneath the Tip of the Iceberg. *Front Nutr.* 2020;7:53. <https://doi.org/10.3389/fnut.2020.00053> PMID: [32457915](https://pubmed.ncbi.nlm.nih.gov/32457915/)
27. Qiu X, Kuang J, Huang Y, Wei C, Zheng X. The association between Weight-adjusted-Waist Index (WWI) and cognitive function in older adults: a cross-sectional NHANES 2011–2014 study. *BMC Public Health.* 2024;24(1):2152. <https://doi.org/10.1186/s12889-024-19332-w> PMID: [39118100](https://pubmed.ncbi.nlm.nih.gov/39118100/)
28. Johnson CL, Paulose-Ram R, Ogden CL, Carroll MD, Kruszon-Moran D, Dohrmann SM, et al. National health and nutrition examination survey: analytic guidelines, 1999–2010. *Vital Health Stat 2* 161:1–24. 2013.
29. Yu L, Chen Y, Xu M, Li R, Zhang J, Zhu S, et al. Association of weight-adjusted-waist index with asthma prevalence and the age of first asthma onset in United States adults. *Front Endocrinol (Lausanne).* 2023;14:1116621. <https://doi.org/10.3389/fendo.2023.1116621> PMID: [36896186](https://pubmed.ncbi.nlm.nih.gov/36896186/)
30. Yao S, Zeng L, Wang F, Chen K. Obesity Paradox in Lung Diseases: What Explains It? *Obes Facts.* 2023; 16(5):411–26.
31. Dixon AE, Peters U. The effect of obesity on lung function. *Expert Rev Respir Med.* 2018;12(9):755–67. <https://doi.org/10.1080/17476348.2018.1506331> PMID: [30056777](https://pubmed.ncbi.nlm.nih.gov/30056777/)
32. Pasquali R. Obesity and androgens: facts and perspectives. *Fertil Steril.* 2006;85(5):1319–40. <https://doi.org/10.1016/j.fertnstert.2005.10.054> PMID: [16647374](https://pubmed.ncbi.nlm.nih.gov/16647374/)
33. Lovejoy JC, Sainsbury A. Sex differences in obesity and the regulation of energy homeostasis. *Obes Rev.* 2009;10(2):154–67. <https://doi.org/10.1111/j.1467-789X.2008.00529.x> PMID: [19021872](https://pubmed.ncbi.nlm.nih.gov/19021872/)
